# Supplementary material for: Incidence and Prediction Nomogram for Metabolic Syndrome in a Middle-aged Vietnamese Population: a 5-year Follow-up Study
Source: Research Square preprint supplement (doi:10.21203/rs.3.rs-582331/v1), 2021-06-08
Supplement: Supplementary file 1 [file c8aed6861e559416d77e564b.docx]

**Additional Table** Compare of characteristics between follow up and follow up loss group at the baseline

| Variable | Follow-up  (*n* = 1150) | Lost follow up  (*n* = 871) | *P*-value |
| --- | --- | --- | --- |
| Age (median, quartile) years | 51.1 (46.0−56.0) | 50.5 (45.0−55.0) | 0.056a |
| Gender (*n*, %) | | |  |
| Male | 415 (36.1) | 309 (35.5) | 0.77c |
| Female | 735 (63.9) | 562 (64.5) |  |
| Body mass index (mean ± SD) kg/m2 | 21.1 ± 2.4 | 20.9 ± 2.6 | 0.043b |
| Body fat (mean ± SD) % | 27.2 (23.3−31.0) | 27.1 (22.5−31.1) | 0.812b |
| Wait circumference (mean ± SD) cm | 73.0 (68.5−78.5) | 72.5 (67.7−77.5) | 0.035a |
| Systolic blood pressure (median, quartile) mmHg | 110.0 (100.0−120.0) | 110.0 (100.0−120.0) | 0.718a |
| Diastolic blood pressure (median, quartile) mmHg | 70.0 (60.0−80.0) | 70.0 (61.0−80.0) | 0.072a |
| Triglycerides (median, quartile) mmol/L | 1.29 (0.98−1.95) | 1.28 (0.98−1.90) | 0.884a |
| HDL-cholesterol (median, quartile) mmol/L | 1.29 (1.01−1.66) | 1.30 (1.03−1.65) | 0.799a |
| Fasting glucose (median, quartile) mmol/L | 4.50 (4.00−5.00) | 4.50 (4.10−5.00) | 0.295a |
| Education level (*n*, %) | | | 0.025c |
| Elementary | 96 (8.3) | 94 (10.8) |  |
| Intermediate | 720 (62.6) | 555 (63.7) |  |
| Secondary | 146 (12.7) | 116 (13.3) |  |
| Post–secondary | 188 (16.3) | 106 (12.2) |  |
| Income level | | | 0.848c |
| < 25 percentiles | 295 (25.7) | 212 (24.3) |  |
| < 25 percentiles | 294 (25.6) | 234 (26.9) |  |
| 50– < 75 percentiles | 273 (23.7) | 212 (24.3) |  |
| ≥75 percentiles | 288 (25.0) | 213 (24.5) |  |
| Smoking (*n,* %) | | | 0.035c |
| None | 829 (72.1) | 646 (74.2) |  |
| Ex-smokers | 66 (7.6) | 126 (11.8) |  |
| Current smokers | 159 (18.3) | 195 (17.0) |  |
| Leisure time (median, quartile) hour/day | 5.1 (3.0−7.0) | 5.0 (3.0−7.0) | 0.446a |
| Sleeping time (median, quartile) hour/day | 7.0 (6.0−7.0) | 7.0 (6.0−7.0) | 0.101a |
| Family history of diabetes (*n*, %) |  |  |  |
| Yes | 68 (5.9) | 23 (2.6) | <0.0001c |
| No | 1082 (94.1) | 848 (97.4) |  |

a The Mann-Whitney U test used to compare the groups

b The T-test used to compare the groups

c The Chi-Square used to compare 2 groups
